# Supplementary material for: Making Votes Count with Internet Voting
Source: Springer Nature journal article supplement (doi:10.1007/s11109-020-09598-2), 2020-03-02
Supplement: MOESM1 [file 17762654]

# Making Votes Count with Internet Voting

## Online Supplement

Micha Germann

Department of Politics, Languages & International Studies

University of Bath

November 11, 2019

Table S1: Residual vote rate models without expatriates

| Model                               | (1)<br>All<br>referendums | (2)<br>Federal<br>referendums | (3)<br>Cantonal<br>referendums |
|-------------------------------------|---------------------------|-------------------------------|--------------------------------|
| I-voting                            | -0.30<br>(0.09)<br>[0.00] | -0.23<br>(0.12)<br>[0.05]     | -0.44<br>(0.10)<br>[0.00]      |
| Control for electoral participation | ✓                         | ✓                             | ✓                              |
| Municipalities                      | 45                        | 45                            | 45                             |
| Voting days                         | 53                        | 49                            | 44                             |
| Referendums                         | 284                       | 138                           | 146                            |
| Observations                        | 12780                     | 6210                          | 6570                           |

Note: The table shows coefficients from OLS regressions including municipality and referendum fixed effects as well as quadratic municipality-level time trends. Contrary to the models reported in the paper, expatriates are not included as an artificial 46<sup>th</sup> municipality. All models control for electoral turnout. Standard errors clustered by municipality are shown in parentheses and p-values in square brackets.

Table S2: Residual vote rate models without control for electoral turnout

| Model                               | (1)<br>All<br>referendums | (2)<br>Federal<br>referendums | (3)<br>Cantonal<br>referendums |
|-------------------------------------|---------------------------|-------------------------------|--------------------------------|
| I-voting                            | -0.32<br>(0.09)<br>[0.00] | -0.25<br>(0.11)<br>[0.04]     | -0.44<br>(0.10)<br>[0.00]      |
| Control for electoral participation | <b>X</b>                  | <b>X</b>                      | <b>X</b>                       |
| Municipalities                      | 46                        | 46                            | 46                             |
| Voting days                         | 53                        | 49                            | 44                             |
| Referendums                         | 284                       | 138                           | 146                            |
| Observations                        | 13064                     | 6348                          | 6716                           |

Note: The table shows coefficients from OLS regressions including municipality and referendum fixed effects as well as quadratic municipality-level time trends. Contrary to the models reported in the paper, these models do not control for electoral participation. Standard errors clustered by municipality are shown in parentheses and p-values in square brackets.

Table S3: Additional robustness checks residual vote rate analysis:  
Federal referendums only

| Model                               | (1)                       | (2)                       | (3)                       | (4)                       |
|-------------------------------------|---------------------------|---------------------------|---------------------------|---------------------------|
| I-voting                            | -0.23<br>(0.12)<br>[0.06] | -0.24<br>(0.13)<br>[0.07] | -0.25<br>(0.12)<br>[0.04] | -0.25<br>(0.14)<br>[0.08] |
| Placebo treatment                   | 0.06<br>(0.12)<br>[0.59]  |                           |                           |                           |
| Control for electoral participation | ✓                         | ✓                         | ✓                         | ✓                         |
| Additional covariates               | <b>X</b>                  | ✓                         | <b>X</b>                  | <b>X</b>                  |
| No simultaneous municipal contests  | <b>X</b>                  | <b>X</b>                  | ✓                         | <b>X</b>                  |
| Two-way clustered standard errors   | <b>X</b>                  | <b>X</b>                  | <b>X</b>                  | ✓                         |
| Municipalities                      | 46                        | 45                        | 46                        | 46                        |
| Voting days                         | 49                        | 46                        | 49                        | 49                        |
| Referendums                         | 138                       | 126                       | 138                       | 138                       |
| Observations                        | 6348                      | 5670                      | 6264                      | 6348                      |

Note: The table shows coefficients from OLS regressions including municipality and referendum fixed effects as well as quadratic municipality-level time trends. All models control for electoral turnout. Standard errors clustered by municipality (and, in model 4, by voting day) are shown in parentheses and p-values in square brackets. All models include federal referendums only.

Table S4: Additional robustness checks residual vote rate analysis:  
Cantonal referendums only

| Model                               | (1)                       | (2)                       | (3)                       | (4)                       |
|-------------------------------------|---------------------------|---------------------------|---------------------------|---------------------------|
| I-voting                            | -0.40<br>(0.11)<br>[0.00] | -0.42<br>(0.11)<br>[0.00] | -0.48<br>(0.10)<br>[0.00] | -0.46<br>(0.14)<br>[0.00] |
| Placebo treatment                   | 0.25<br>(0.19)<br>[0.19]  |                           |                           |                           |
| Control for electoral participation | ✓                         | ✓                         | ✓                         | ✓                         |
| Additional covariates               | ✗                         | ✓                         | ✗                         | ✗                         |
| No simultaneous municipal contests  | ✗                         | ✗                         | ✓                         | ✗                         |
| Two-way clustered standard errors   | ✗                         | ✗                         | ✗                         | ✓                         |
| Municipalities                      | 46                        | 45                        | 46                        | 46                        |
| Voting days                         | 44                        | 41                        | 44                        | 44                        |
| Referendums                         | 146                       | 130                       | 146                       | 146                       |
| Observations                        | 6716                      | 5850                      | 6639                      | 6716                      |

Note: The table shows coefficients from OLS regressions including municipality and referendum fixed effects as well as quadratic municipality-level time trends. All models control for electoral turnout. Standard errors clustered by municipality (and, in model 4, by voting day) are shown in parentheses and p-values in square brackets. All models include cantonal referendums only.

Table S5: Referendum outcomes analysis: No expatriates

| Model                               | (1)                      | (2)                       | (3)                            | (4)                                 |
|-------------------------------------|--------------------------|---------------------------|--------------------------------|-------------------------------------|
| Dependent variable                  | Support<br>Socialists    | Support<br>Greens         | Support<br>redistri-<br>bution | Support<br>cultural<br>conservatism |
| I-voting                            | 0.19<br>(0.27)<br>[0.50] | -0.03<br>(0.49)<br>[0.96] | -0.19<br>(0.51)<br>[0.71]      | -0.32<br>(0.61)<br>[0.61]           |
| Control for electoral participation | ✓                        | ✓                         | ✓                              | ✓                                   |
| Municipalities                      | 45                       | 45                        | 45                             | 45                                  |
| Voting days                         | 53                       | 53                        | 35                             | 28                                  |
| Referendums                         | 275                      | 264                       | 66                             | 38                                  |
| Observations                        | 12375                    | 11880                     | 2970                           | 1710                                |

Note: The table shows coefficients from OLS regressions including municipality and referendum fixed effects as well as quadratic municipality-level time trends. Contrary to the models reported in the paper, expatriates are not included as an artificial 46<sup>th</sup> municipality. All models control for electoral turnout. Standard errors clustered by municipality are shown in parentheses and p-values in square brackets. All models include both cantonal and federal referendums.

Table S6: Referendum outcomes analysis: No control for turnout

| Model                               | (1)                      | (2)                      | (3)                            | (4)                                 |
|-------------------------------------|--------------------------|--------------------------|--------------------------------|-------------------------------------|
| Dependent variable                  | Support<br>Socialists    | Support<br>Greens        | Support<br>redistri-<br>bution | Support<br>cultural<br>conservatism |
| I-voting                            | 0.23<br>(0.27)<br>[0.39] | 0.06<br>(0.48)<br>[0.90] | -0.19<br>(0.49)<br>[0.70]      | -0.18<br>(0.62)<br>[0.78]           |
| Control for electoral participation | <b>X</b>                 | <b>X</b>                 | <b>X</b>                       | <b>X</b>                            |
| Municipalities                      | 46                       | 46                       | 46                             | 46                                  |
| Voting days                         | 53                       | 53                       | 35                             | 28                                  |
| Referendums                         | 275                      | 264                      | 66                             | 38                                  |
| Observations                        | 12650                    | 12144                    | 3036                           | 1748                                |

Note: The table shows coefficients from OLS regressions including municipality and referendum fixed effects as well as quadratic municipality-level time trends. Contrary to the results reported in the paper, the models do not control for electoral turnout. Standard errors clustered by municipality are shown in parentheses and p-values in square brackets. All models include both cantonal and federal referendums.

Table S7: Referendum outcomes analysis: Placebo checks

| Model                               | (1)                      | (2)                      | (3)                            | (4)                                 |
|-------------------------------------|--------------------------|--------------------------|--------------------------------|-------------------------------------|
| Dependent variable                  | Support<br>Socialists    | Support<br>Greens        | Support<br>redistri-<br>bution | Support<br>cultural<br>conservatism |
| I-voting                            | 0.46<br>(0.38)<br>[0.23] | 0.19<br>(0.52)<br>[0.71] | -0.03<br>(0.42)<br>[0.94]      | -0.37<br>(0.60)<br>[0.55]           |
| Placebo treatment                   | 1.06<br>(0.72)<br>[0.15] | 0.61<br>(0.40)<br>[0.13] | 0.45<br>(0.75)<br>[0.55]       | -0.70<br>(0.36)<br>[0.06]           |
| Control for electoral participation | <b>✓</b>                 | <b>✓</b>                 | <b>✓</b>                       | <b>✓</b>                            |
| Municipalities                      | 46                       | 46                       | 46                             | 46                                  |
| Voting days                         | 53                       | 53                       | 35                             | 28                                  |
| Referendums                         | 275                      | 264                      | 66                             | 38                                  |
| Observations                        | 12650                    | 12144                    | 3036                           | 1748                                |

Note: The table shows coefficients from OLS regressions including municipality and referendum fixed effects as well as quadratic municipality-level time trends. All models control for electoral turnout and include a placebo treatment that is coded 1 for the three voting days before a municipality's first i-voting trial, 0 otherwise. Standard errors clustered by municipality are shown in parentheses and p-values in square brackets. All models include both cantonal and federal referendums.

Table S8: Referendum outcomes analysis: Additional controls

| Model                               | (1)                      | (2)                      | (3)                            | (4)                                 |
|-------------------------------------|--------------------------|--------------------------|--------------------------------|-------------------------------------|
| Dependent variable                  | Support<br>Socialists    | Support<br>Greens        | Support<br>redistri-<br>bution | Support<br>cultural<br>conservatism |
| I-voting                            | 0.12<br>(0.30)<br>[0.68] | 0.01<br>(0.54)<br>[0.98] | -0.36<br>(0.52)<br>[0.50]      | 0.00<br>(0.72)<br>[1.00]            |
| Control for electoral participation | ✓                        | ✓                        | ✓                              | ✓                                   |
| Additional covariates               | ✓                        | ✓                        | ✓                              | ✓                                   |
| Municipalities                      | 45                       | 45                       | 45                             | 45                                  |
| Voting days                         | 50                       | 50                       | 32                             | 25                                  |
| Referendums                         | 248                      | 237                      | 59                             | 34                                  |
| Observations                        | 11160                    | 10665                    | 2655                           | 1530                                |

Note: The table shows coefficients from OLS regressions including municipality and referendum fixed effects as well as quadratic municipality-level time trends. All models control for electoral turnout, per capita income (logged), population size (logged), unemployment rate, age group shares (20–34; 35–49; 50–65; and 65+), the share of foreigners (i.e., non-Swiss nationals), and vote shares for the Socialists and Greens in the previous national election (lower chamber). Standard errors clustered by municipality are shown in parentheses and p-values in square brackets. All models include both cantonal and federal referendums.

Table S9: Referendum outcomes analysis: No simultaneous municipal contests

| Model                               | (1)                      | (2)                      | (3)                            | (4)                                 |
|-------------------------------------|--------------------------|--------------------------|--------------------------------|-------------------------------------|
| Dependent variable                  | Support<br>Socialists    | Support<br>Greens        | Support<br>redistri-<br>bution | Support<br>cultural<br>conservatism |
| I-voting                            | 0.15<br>(0.28)<br>[0.60] | 0.05<br>(0.49)<br>[0.92] | -0.19<br>(0.50)<br>[0.71]      | -0.28<br>(0.62)<br>[0.65]           |
| Control for electoral participation | ✓                        | ✓                        | ✓                              | ✓                                   |
| No simultaneous municipal contests  | ✓                        | ✓                        | ✓                              | ✓                                   |
| Municipalities                      | 46                       | 46                       | 46                             | 46                                  |
| Voting days                         | 53                       | 53                       | 35                             | 28                                  |
| Referendums                         | 275                      | 264                      | 66                             | 38                                  |
| Observations                        | 12492                    | 11991                    | 3003                           | 1722                                |

Note: The table shows coefficients from OLS regressions including municipality and referendum fixed effects as well as quadratic municipality-level time trends. All models control for electoral turnout. Standard errors clustered by municipality are shown in parentheses and p-values in square brackets. All models include both cantonal and federal referendums but all observations (i.e., municipality-voting days) with a simultaneous municipal election or referendum are dropped.

Table S10: Referendum outcomes analysis: Only federal referendums

| Model                               | (1)                      | (2)                       | (3)                            | (4)                                 |
|-------------------------------------|--------------------------|---------------------------|--------------------------------|-------------------------------------|
| Dependent variable                  | Support<br>Socialists    | Support<br>Greens         | Support<br>redistri-<br>bution | Support<br>cultural<br>conservatism |
| I-voting                            | 0.22<br>(0.36)<br>[0.55] | -0.30<br>(0.39)<br>[0.44] | -0.46<br>(1.52)<br>[0.77]      | -0.58<br>(0.76)<br>[0.45]           |
| Control for electoral participation | ✓                        | ✓                         | ✓                              | ✓                                   |
| Municipalities                      | 46                       | 46                        | 46                             | 46                                  |
| Voting days                         | 49                       | 49                        | 26                             | 24                                  |
| Referendums                         | 133                      | 130                       | 30                             | 32                                  |
| Observations                        | 6118                     | 5980                      | 1380                           | 1472                                |

Note: The table shows coefficients from OLS regressions including municipality and referendum fixed effects as well as quadratic municipality-level time trends. All models control for electoral turnout. Standard errors clustered by municipality are shown in parentheses and p-values in square brackets. All models include federal referendums only.

Table S11: Referendum outcomes analysis: Only cantonal referendums

| Model                               | (1)                       | (2)                      | (3)                            | (4)                                 |
|-------------------------------------|---------------------------|--------------------------|--------------------------------|-------------------------------------|
| Dependent variable                  | Support<br>Socialists     | Support<br>Greens        | Support<br>redistri-<br>bution | Support<br>cultural<br>conservatism |
| I-voting                            | -0.02<br>(0.49)<br>[0.97] | 0.48<br>(0.68)<br>[0.49] | -0.55<br>(0.60)<br>[0.37]      | 1.86<br>(1.17)<br>[0.12]            |
| Control for electoral participation | ✓                         | ✓                        | ✓                              | ✓                                   |
| Municipalities                      | 46                        | 46                       | 46                             | 46                                  |
| Voting days                         | 44                        | 44                       | 22                             | 24                                  |
| Referendums                         | 142                       | 134                      | 36                             | 5                                   |
| Observations                        | 6532                      | 6164                     | 1656                           | 276                                 |

Note: The table shows coefficients from OLS regressions including municipality and referendum fixed effects as well as quadratic municipality-level time trends. All models control for electoral turnout. Standard errors clustered by municipality are shown in parentheses and p-values in square brackets. All models include cantonal referendums only.

Table S12: List of referendums used for the measurement of ‘support redistribution’

| Voting day | ID         | Issue description                                                                                                    | Direction |
|------------|------------|----------------------------------------------------------------------------------------------------------------------|-----------|
| 12/2/2001  | 2001120210 | Institute capital gains tax                                                                                          | Yes       |
| 3/3/2002   | 2002030303 | 36h work week                                                                                                        | Yes       |
| 6/2/2002   | 2002060201 | Right to basic social security                                                                                       | Yes       |
| 6/2/2002   | 2002060202 | Tax hike for corporations and the well-off                                                                           | Yes       |
| 10/27/2002 | 2002102701 | Tax benefits for families                                                                                            | Yes       |
| 11/24/2002 | 2002112401 | Lower rent control after renovations                                                                                 | No        |
| 11/24/2002 | 2002112403 | Cut unemployment benefits                                                                                            | No        |
| 5/18/2003  | 2003051801 | Measures to support social housing, including expropriations                                                         | Yes       |
| 5/18/2003  | 2003051802 | Tax hike for corporations and the well-off                                                                           | Yes       |
| 5/18/2003  | 2003051805 | Rents should not only increase when mortgage interest rates increase, but also decrease when the latter decrease     | Yes       |
| 5/18/2003  | 2003051807 | Income-dependent health insurance premiums                                                                           | Yes       |
| 2/8/2004   | 2004020801 | Lower taxes for home buyers                                                                                          | No        |
| 2/8/2004   | 2004020802 | Decrease tenants protection (tenants can be forced out of apartment if they cannot/do not want to buy the apartment) | No        |
| 2/8/2004   | 2004020803 | Eliminate inheritance and gift taxes for spouses and direct descendants                                              | No        |
| 5/16/2004  | 2004051601 | Cuts to old-age pensions, increase women’s pension age to 65                                                         | No        |
| 5/16/2004  | 2004051603 | Tax cuts that disproportionately favor the wealthy while harming the cantons                                         | No        |
| 9/26/2004  | 2004092602 | Determine rent increases after renovations by square meter (implying significant rent hikes)                         | No        |
| 9/26/2004  | 2004092606 | Maternity leave                                                                                                      | Yes       |
| 11/28/2004 | 2004112802 | Prevent tax hike for corporations                                                                                    | No        |
| 11/28/2004 | 2004112804 | Extension of federation’s right to levy income tax                                                                   | Yes       |
| 4/24/2005  | 2005042403 | Lower wealth tax                                                                                                     | No        |
| 4/24/2005  | 2005042404 | Lower income tax                                                                                                     | No        |
| 4/24/2005  | 2005042406 | Reduce unemployment benefits                                                                                         | No        |
| 4/24/2005  | 2005042408 | Reduce benefits for the disabled                                                                                     | No        |
| 11/26/2006 | 2006112602 | Increase family allowances                                                                                           | Yes       |
| 3/11/2007  | 2007031101 | Improve elderly care                                                                                                 | Yes       |
| 3/11/2007  | 2007031103 | Single health insurance (no competition between private insurance companies); income-dependent premiums              | Yes       |
| 6/17/2007  | 2007061705 | Cuts to disability insurance                                                                                         | No        |

Continued on next page

Table S12 – continued from previous page

| Voting day | ID         | Issue description                                                                            | Direction |
|------------|------------|----------------------------------------------------------------------------------------------|-----------|
| 12/16/2007 | 2007121601 | Tax break for corporations                                                                   | No        |
| 12/16/2007 | 2007121604 | Lower unemployment benefits; higher incentives for reintegration into work force             | No        |
| 12/16/2007 | 2007121607 | Tax hike for high-income earners                                                             | Yes       |
| 12/16/2007 | 2007121608 | Temporary hike of wealth tax                                                                 | Yes       |
| 2/24/2008  | 2008022402 | Lower public transport fares                                                                 | Yes       |
| 2/24/2008  | 2008022406 | Tax breaks for corporations                                                                  | No        |
| 6/1/2008   | 2008060101 | Decrease gifts and donation tax                                                              | No        |
| 11/30/2008 | 2008113005 | Citizens with annual income of less than ca. 120'000 CHF should be allowed to retire with 62 | Yes       |
| 5/17/2009  | 2009051702 | Lower corporate and dividends taxes                                                          | No        |
| 9/27/2009  | 2009092701 | Reduce corporate taxes                                                                       | No        |
| 9/27/2009  | 2009092704 | Increase funding for social housing                                                          | Yes       |
| 9/27/2009  | 2009092707 | Hike VAT tax rate to the benefit of disability insurance                                     | Yes       |
| 3/7/2010   | 2010030704 | Lower old-age pension payments                                                               | No        |
| 9/26/2010  | 2010092604 | Cut unemployment benefits; increase social security contributions                            | No        |
| 11/28/2010 | 2010112808 | Forbid degressive tax rates; federal minimum for cantonal income and wealth taxes            | Yes       |
| 2/13/2011  | 2011021301 | Tax amnesty                                                                                  | No        |
| 3/11/2012  | 2012031104 | Tax break for prospective home owners                                                        | No        |
| 3/11/2012  | 2012031105 | Six weeks of holidays as statutory minimum                                                   | Yes       |
| 6/17/2012  | 2012061701 | Daycare centers                                                                              | Yes       |
| 6/17/2012  | 2012061705 | Tax break for prospective home owners                                                        | No        |
| 3/3/2013   | 2013030301 | Lower public transport fares                                                                 | Yes       |
| 3/3/2013   | 2013030303 | Daycare centers, family policy                                                               | Yes       |
| 11/24/2013 | 2013112401 | Prevent wage excesses                                                                        | Yes       |
| 5/18/2014  | 2014051801 | Lower public transport fares                                                                 | Yes       |
| 5/18/2014  | 2014051805 | Federal minimum wage                                                                         | Yes       |
| 9/28/2014  | 2014092803 | Single state health insurance instead of private market of health insurance providers        | Yes       |
| 11/30/2014 | 2014113001 | Getting rid of tax breaks for rich foreign nationals (canton-level)                          | Yes       |
| 11/30/2014 | 2014113004 | Get rid of tax breaks for rich foreign nationals                                             | Yes       |
| 6/14/2015  | 2015061401 | Reduce rent control                                                                          | No        |
| 6/14/2015  | 2015061403 | Student allowances                                                                           | Yes       |
| 6/14/2015  | 2015061404 | New inheritance tax                                                                          | Yes       |
| 2/28/2016  | 2016022801 | Getting rid of tax breaks for companies newly settling in Geneva                             | Yes       |
| 2/28/2016  | 2016022805 | Reduction of rent subsidies                                                                  | No        |

Continued on next page



Table S12 – continued from previous page

| <b>Voting day</b> | <b>ID</b>  | <b>Issue description</b>                                                        | <b>Direction</b> |
|-------------------|------------|---------------------------------------------------------------------------------|------------------|
| 2/28/2016         | 2016022806 | Reduce canton’s contributions to health care premiums                           | No               |
| 2/28/2016         | 2016022807 | Reduction of cantonal contributions to poor pensioners and poor disabled people | No               |
| 6/5/2016          | 2016060505 | Tax break for certain rich foreign nationals                                    | No               |
| 6/5/2016          | 2016060508 | Basic income                                                                    | Yes              |
| 9/25/2016         | 2016092504 | Increase old-age pensions                                                       | Yes              |

Note: ID refers to the unique referendum identifier in the replication data. Direction = ‘Yes’ means that the yes vote share is used for the measurement of ‘support redistribution’; whereas direction = ‘No’ means that the no vote share is used for the measurement of ‘support redistribution’.

Table S13: List of referendums used for the measurement of ‘support cultural conservatism’

| <b>Voting day</b> | <b>ID</b>  | <b>Issue description</b>                                                                   | <b>Direction</b> |
|-------------------|------------|--------------------------------------------------------------------------------------------|------------------|
| 3/4/2001          | 2001030401 | Right to vote for foreigners                                                               | No               |
| 3/4/2001          | 2001030403 | Switzerland should start membership negotiations with EU                                   | No               |
| 12/2/2001         | 2001120208 | Abolish the army                                                                           | No               |
| 3/3/2002          | 2002030302 | Switzerland should join the UN                                                             | No               |
| 6/2/2002          | 2002060206 | Legalize abortion in first 12 weeks                                                        | No               |
| 6/2/2002          | 2002060207 | Forbid abortion                                                                            | Yes              |
| 11/24/2002        | 2002112402 | Stricter asylum law                                                                        | Yes              |
| 5/18/2003         | 2003051803 | Shorter military duty; fewer soldiers; allowing women in the military                      | No               |
| 2/8/2004          | 2004020806 | Lifelong detention of dangerous sexual and violent offenders                               | Yes              |
| 9/26/2004         | 2004092603 | Facilitate naturalization of second generation foreign nationals                           | No               |
| 9/26/2004         | 2004092604 | Facilitate naturalization of third generation foreign nationals                            | No               |
| 4/24/2005         | 2005042401 | Right to vote and right to be elected for foreigners                                       | No               |
| 4/24/2005         | 2005042402 | Right to vote for foreigners                                                               | No               |
| 6/5/2005          | 2005060501 | Schengen and Dublin treaties (strengthening of European cooperation and integration)       | No               |
| 6/5/2005          | 2005060502 | Civil partnerships                                                                         | No               |
| 9/25/2005         | 2005092501 | Extension of free movement of persons to new EU countries                                  | No               |
| 9/24/2006         | 2006092409 | Stricter aliens law                                                                        | Yes              |
| 9/24/2006         | 2006092410 | Stricter asylum law                                                                        | Yes              |
| 11/26/2006        | 2006112601 | Development aid to Eastern European states (imposed by the EU in return for market access) | No               |
| 3/11/2007         | 2007031102 | Crack down on illegal advertisement posters                                                | Yes              |
| 5/20/2007         | 2007052001 | Increase equality between civil partnership and marriage in tax matters                    | No               |
| 11/30/2008        | 2008113004 | Exemption from the statute of limitations for pedophile acts                               | Yes              |
| 11/30/2008        | 2008113007 | Legalize marijuana                                                                         | No               |
| 11/30/2008        | 2008113008 | Liberal drug policy                                                                        | No               |
| 2/8/2009          | 2009020805 | Free movement of persons with Bulgaria and Romania                                         | No               |
| 11/29/2009        | 2009112905 | Outlaw minarets                                                                            | Yes              |
| 11/28/2010        | 2010112805 | Deport criminal foreign nationals                                                          | Yes              |

Continued on next page

Table S13 – continued from previous page

| <b>Voting day</b> | <b>ID</b>  | <b>Issue description</b>                                                                                             | <b>Direction</b> |
|-------------------|------------|----------------------------------------------------------------------------------------------------------------------|------------------|
| 3/11/2012         | 2012031102 | Restrict right to demonstrate to prevent violent excesses                                                            | Yes              |
| 6/9/2013          | 2013060902 | Tighten asylum law                                                                                                   | Yes              |
| 9/22/2013         | 2013092202 | Abolish military conscription                                                                                        | No               |
| 2/9/2014          | 2014020904 | Abortion should not be covered by health insurance                                                                   | Yes              |
| 2/9/2014          | 2014020905 | Immigration cuts                                                                                                     | Yes              |
| 5/18/2014         | 2014051806 | New fighter jets                                                                                                     | Yes              |
| 11/30/2014        | 2014113005 | Immigration cuts                                                                                                     | Yes              |
| 2/28/2016         | 2016022809 | Definition of marriage as union between man and woman; no discrimination of married couples versus unmarried couples | Yes              |
| 2/28/2016         | 2016022810 | Deport criminal foreign nationals                                                                                    | Yes              |
| 6/5/2016          | 2016060511 | Streamline asylum process; free legal counsel for asylum seekers                                                     | No               |
| 9/25/2016         | 2016092505 | Strengthen intelligence service and surveillance capabilities                                                        | Yes              |

Note: ID refers to the unique referendum identifier in the replication data. Direction = ‘Yes’ means that the yes vote share is used for the measurement of ‘support for cultural conservatism’; whereas direction = ‘No’ means that the no vote share is used for the measurement of ‘support for cultural conservatism’.
